## **The Potency of Luliconazole, against Clinical and Environmental *Aspergillus Nigri* Complex**

**Sahar Hivary<sup>1</sup>, Mahnaz Fatahinia<sup>1,2</sup>, Simin Taghipour<sup>1</sup>, Marzieh Halvaezadeh<sup>1</sup>, Ali Zarei Mahmoudabadi<sup>1,2</sup>**

<sup>1</sup>Department of Medical Mycology, School of Medicine, Ahvaz Jundishapur University of Medical Sciences, Ahvaz, Iran

<sup>2</sup>Infectious and Tropical Diseases Research Center, Health Research Institute, Ahvaz Jundishapur University of Medical Sciences, Ahvaz, Iran

**Correspondence:** Prof. Ali Zarei Mahmoudabadi, Infectious and Tropical Diseases Research Center, Health Research Institute, Ahvaz Jundishapur University of Medical Sciences, Ahvaz, Iran, Email: zarei40@hotmail.com; Tel: +986133330074; Fax: +986133332036

**Running title:** Luliconazole, against *Aspergillus Nigri* Complex

## ABSTRACT

Black aspergilli are, the most causes of otomycosis and *Aspergillus niger* and *A. tubingensis* are two more frequently isolates. Although, amphotericin B was a gold standard for the treatment of invasive fungal infection for several decades, it replaced by fluconazole and /or voriconazole. Luliconazole, appears to offer the potential for *in vitro* activity against black aspergilli. The aim of the present study was to compare the *in vitro* activity of a novel antifungal agent, luliconazole, with commonly used antifungals against clinical and environmental strains of black aspergilli. Sixty seven strains of black aspergilli were identified using morphological and molecular tests ( $\beta$ -Tubulin gene). Antifungal susceptibility test was applied according to CLSI M38 A2. The results were reported as MIC/MEC range, MIC/MEC<sub>50</sub>, MIC/MEC<sub>90</sub> and MIC/MEC<sub>GM</sub>. It was found that the lowest MIC range, MIC<sub>50</sub>, MIC<sub>90</sub>, and MIC<sub>GM</sub> was attributed to luliconazole in clinical strains. *Aspergillus niger* was the common isolate followed by, *A. tubingensis* and 54.1% (clinical) and 30% (environmental) of isolates were resistant to caspofungin. The highest resistant rate was found in amphotericin B for both clinical (86.5%) and environmental (96.7%) strains. Clinical strains of *Aspergillus* were more sensitive to voriconazole (86.7%) than environmental strains (70.3%). On the other hand, 83.8% of clinical and 70% of environmental isolates were resistant to posaconazole, respectively. In conclusion, luliconazole compare to routine antifungals is a potent antifungal for *A. niger* complex *in vitro*. The MIC range, MIC<sub>50</sub>, MIC<sub>90</sub> and MIC<sub>GM</sub> of luliconazole against black aspergilli were the lowest among the representative tested antifungals.

**Keywords:** Black aspergilli, Luliconazole, Clinical and environmental isolates, Antifungal profile

## Introduction

Luliconazole (Luzu®), (-)-(E)-[(4R)-4-(2,4-dichlorophenyl)-1,3-dithiolan-2-ylidene] (1H-imidazol-1-yl) acetonitrile), is an imidazole antifungal with molecular formula: C<sub>14</sub>H<sub>9</sub>Cl<sub>2</sub>N<sub>3</sub>S<sub>2</sub> [1]. Luliconazole was basically introduced as anti-dermatophytic antifungal in Japan and India [1, 2]. However, it has demonstrated activity *in vitro* against multiple *Aspergillus* spp. including *Aspergillus fumigatus* [3, 4], *A. terreus* [4, 5], *A. flavus* [4, 6], *A. niger* [4] and *A. tubingensis* [4]. The availability of a novel antifungal, luliconazole, appears to offer the potential for improved therapy for a wide range of invasive fungal infections, including aspergillosis, dermatophytosis, and onychomycosis [2, 7, 8].

While, amphotericin B was a Gold standard in the first-line treatment of invasive fungal infections for several decades [9], it has been replaced by several new antifungals including, voriconazole, posaconazole and caspofungin [10, 11]. Voriconazole was presented as the primary therapy for invasive pulmonary aspergillosis in a clinical trials [12]. Further studies have shown that posaconazole is a useful antifungal for invasive fungal infection including aspergillosis [13]. On the other hand, during 2-3 last decades, caspofungin was developed to improve the prognosis of invasive aspergillosis [14].

The section Nigri (*A. niger*, sensu lato) contains more than 19 accepted species including, *A. niger*, *A. tubingensis*, *A. awamory*, *A. welwitschiae*, *A. acidus*, *A. brasiliensis* and others [15-18]. The aspergilli in this section are comprised of several closely related species, and identification based on sequence analyses of  $\beta$ -tubulin gene [4]. *Aspergillus niger* and *A. tubingensis* isolates frequently isolated in clinical infections [16, 19-21]. Black aspergilli cause several types of aspergillosis among predisposed patients [22-25]. Out of them, otomycosis is the most common cutaneous infection caused by black aspergilli [4, 20].

The increasing of fungal opportunistic infections among patients receiving intensive chemotherapy, hematological malignancies and transplant patients during last decades is

remarkable [10, 23, 26-28]. Invasive *Aspergillus* infections are one of the life threatening human disease. On the other hand, some species of *Aspergillus* have inherent resistance to some antifungal agents [29]. Moreover, some species have raised minimum inhibitory concentration (MIC) against specific antifungals. As a results, infection prevention consultant and the best choice antifungal are common clinical challenges.

## **Objectives**

The aim of the present study was to compare the *in vitro* activity of a novel antifungal agent, luliconazole, with amphotericin B, voriconazole, posaconazole and caspofungin against clinical and environmental strains of black aspergilli. Furthermore, the potency of each antifungal against clinical and environmental isolates was compared.

## **Materials and Methods**

### ***Fungal isolates***

Thirty seven clinical isolates of black aspergilli were previously isolated from otomycosis samples, identified based on morphology characteristics and preserved at Medical Mycology laboratory affiliated to Ahvaz Jundishapur University of Medical Sciences. Environmental strains (30 strains) of black aspergilli were trapped from airborne spores using Sabouraud dextrose agar (SDA) (BioLife, Italia) plates. Primary screening of black aspergilli strains was applied based on macroscopic (Black colony) and microscopic morphology. All strains (clinical and environmental) were subcultured on SDA and re-identified using molecular tests.

### ***DNA extraction***

All strains (clinical and environment isolates) were subcultured on SDA plates and incubated at 29°C for 24 - 48 hours. Mycelia were collected in cryo-tubes containing 300 µL lysis buffer and 0.46 g glass beads and kept at 4°C for 72 hours. The tube contents were homogenized using a SpeedMill PLUS Homogenizer (Analytikjena, Germany) for 6 minutes

(3 cycles) and boiled at 100°C for 20 minutes. 300 µL of sodium acetate (3 molar) was added to each tube and stored at -20°C for 10 minutes. Supernatants were removed after a centrifugation at 12000 rpm for 10 minutes. DNA was purified using phenol-chloroform-isoamyl alcohol according to a protocol devised by Makimura et al. [30]. Finally purified DNA was preserved at -20 °C for further tests.

### ***Molecular identification***

β-Tubulin gene was used for the molecular detection of strains using primers pair, βt2a (forward), 5' GGTAACCAAATCGGTGCTGCTTTC 3' and βt2b (reverse) 5' ACCCTCAGTGTAGTGACCCTTGGC 3' [31]. PCR products subjected for sequence analysis and then sequences were manually verified by MEGA6 software package (<https://www.megasoftware.net/>) and aligned using the CLUSTALW algorithm. All sequences were compared to reference sequences in the GenBank (NCBI) and CBS database via the nucleotide BLAST™ algorithm to obtain a definitive identification (similarity values ≥ 99%). Finally, all nucleotide sequences representative were deposited in the GenBank database.

### ***Antifungal susceptibility assay***

Twofold serial dilutions of antifungals including, luliconazole (APIChem Technology, China) (from 0.00012 to 0.25 µg/mL), amphotericin B (Sigma - Aldrich, Germany) (from 0.125 to 16 µg/mL), voriconazole (Sigma - Aldrich, Germany) (from 0.0078 to 4 µg/mL), posaconazole (Sigma - Aldrich, Germany) (from 0.0312 to 4 µg/mL), and caspofungin (Sigma - Aldrich, Germany) (from 0.0078 to 1µg/mL) were prepared in RPMI 1640 (Bio Idea, Iran). Antifungal susceptibility test was performed according to CLSI M38 A2 [32]. A standard suspension (0.5 McFarland) of 48 - 72 hours cultures on SDA was prepared in sterile saline (0.85%) with 0.2% Tween 20 (Merck, Germany). Then, 100 µL of diluted suspension (1:50) and 100 µL of serial dilutions of each antifungal were added to

each well of 96-well microplates. Microplates incubated at 35°C for 24 to 72 hours and results were recorded as MIC. Finally, MIC/MEC range, MIC/MEC<sub>50</sub>, MIC/MEC<sub>90</sub> and MIC/MEC<sub>GM</sub> were calculated. CLSI or EUCAST have not been defined any clinical or epidemiologic breakpoints/cut offs for amphotericin B, voriconazole, posaconazole, caspofungin and *Aspergillus* species. Strains susceptibility / resistance to each antifungals was evaluated according to commonly utilized breakpoints (Table 1).

**Table 1:** Defined breakpoints of amphotericin B, voriconazole, posaconazole and caspofungin for *Aspergillus niger* sensu lato [33-38].

| Antifungals    | MIC/MEC (µg/mL) |            |
|----------------|-----------------|------------|
|                | Sensitive       | Resistance |
| Amphotericin B | ≤2              | >2         |
| Posaconazole   | ≤0.5            | >0.5       |
| Voriconazole   | ≤1              | >1         |
| Caspofungin    | ≤0.06           | >0.06      |
| Luliconazole   | Undefined       | Undefined  |

MIC, Minimum inhibitory concentration; MEC, Minimum effective concentration

### *Statistical analysis*

The Chi-squared test using the Social Science Statistics software (Online) was applied to determine the significant between variables and P value < 0.05 is considered as significance level.

## **Results**

### *Molecular detection of isolates*

37 clinical strains of black aspergilli were detected using molecular and sequencing techniques. *Aspergillus niger* (21, 56.8%) was the common strain followed by, *A. tubingensis* (11, 29.8%), *A. luchuensis* (1, 2.7%), and black aspergilli (4, 10.8%) (Table 2). Furthermore, out of 30 environmental black aspergilli isolates, 15 (50%) was identified as *A. niger* followed by, *A. tubingensis* (13, 43.3%), *A. piperis* (1, 3.3%) and black aspergilli (1, 3.3%).

However, we could not identified four clinical and one environmental black aspergilli, using molecular technique due to inadequate DNA sample size.

**Table 2:** Clinical and environmental black aspergilli with accession numbers

| Sources                                 | Morphological identification           | Molecular identification             | Accessions numbers                                                                                                                                                                                               |
|-----------------------------------------|----------------------------------------|--------------------------------------|------------------------------------------------------------------------------------------------------------------------------------------------------------------------------------------------------------------|
| Clinical isolates<br>(37 isolates)      | <i>Aspergillus niger</i><br>sensu lato | <i>A. niger</i> , sensu stricto (21) | LC441155, LC441156, LC441157, LC441158, LC441159, LC441160, LC441161, LC441162, LC441163, LC441164, LC441165, LC441166, LC441167, LC456320, LC456323, LC456326, LC456335, LC456336, LC456337, LC456339, LC456341 |
|                                         |                                        | <i>A. tubingensis</i> (11)           | LC441168, LC441169, LC441170, LC441171, LC456297, LC456298, LC456301, LC456302, LC456303, LC456338, LC456340                                                                                                     |
|                                         |                                        | <i>A. luchuensis</i> (1)             | LC456304                                                                                                                                                                                                         |
|                                         |                                        | Black aspergilli (4)                 | ***                                                                                                                                                                                                              |
| Environmental isolates<br>(30 isolates) | <i>Aspergillus niger</i><br>sensu lato | <i>A. niger</i> , sensu stricto (15) | LC456317, LC456318, LC456319, LC456321, LC456322, LC456324, LC456325, LC456327, LC456328, LC456329, LC456330, LC456331, LC456332, LC456333, LC456334                                                             |
|                                         |                                        | <i>A. tubingensis</i> (13)           | LC456299, LC456300, LC456306, LC456307, LC456308, LC456309, LC456310, LC456311, LC456312, LC456313, LC456314, LC456315, LC456316                                                                                 |
|                                         |                                        | <i>A. piperis</i> (1)                | LC456305                                                                                                                                                                                                         |
|                                         |                                        | Black aspergilli (1)                 | ***                                                                                                                                                                                                              |

### ***Clinical isolates***

It was found that the lowest MIC range (0.00024 - 0.125 µg/mL), MIC<sub>50</sub> (0.00195 µg/mL), MIC<sub>90</sub>, (0.125 µg/mL) and MIC<sub>GM</sub> (0.00295 µg/mL) was attributed to luliconazole (Table 3). The minimum effective concentration (MEC) range for all clinical *Aspergillus* species was 0.0078 - 1 µg/ml for caspofungin. In addition, the 50% and 90% MEC (MEC<sub>50</sub>, MEC<sub>90</sub>) values were 0.125 and 0.5 µg/ml for caspofungin. 54.1% of isolates were resistant to

caspofofungin. The results have shown that the MIC range of amphotericin B for tested isolates was 0.25 - 16  $\mu\text{g}/\text{mL}$ . However,  $\text{MIC}_{50}$ ,  $\text{MIC}_{90}$  was similar, 8  $\mu\text{g}/\text{mL}$ . The highest resistant rate was found in amphotericin B (86.5%). The MIC ranges for clinical isolates of black aspergilli were 0.0078 - 4 and 0.0625 - 4  $\mu\text{g}/\text{mL}$  of voriconazole and posaconazole, respectively. However, the  $\text{MIC}_{\text{GM}}$  for voriconazole (0.77  $\mu\text{g}/\text{mL}$ ) was lower than posaconazole (1.45  $\mu\text{g}/\text{mL}$ ). In our study, 29.7% and 83.8% of isolates were resistant to voriconazole and posaconazole, respectively.



**Table 3:** The antifungal susceptibility pattern of 37 clinical strains of black aspergilli

| <b>Luliconazole</b>      | <b>N</b> | <b>MIC range (µg/mL)</b> | <b>MIC<sub>50</sub> (µg/mL)</b> | <b>MIC<sub>90</sub> (µg/mL)</b> | <b>MIC<sub>GM</sub> (µg/mL)</b> | <b>R (%)</b> |
|--------------------------|----------|--------------------------|---------------------------------|---------------------------------|---------------------------------|--------------|
| <i>Aspergillus niger</i> | 21       | 0.00024 - 0.125          | 0.00195                         | 0.125                           | 0.00378                         | -            |
| <i>A. tubingenensis</i>  | 11       | 0.00024 - 0.125          | 0.00195                         | 0.00391                         | 0.00251                         | -            |
| <i>A. luchuensis</i>     | 1        | 0.00098                  | -                               | -                               | -                               | -            |
| Black aspergilli         | 4        | 0.00049 - 0.00391        | -                               | -                               | -                               | -            |
| Total                    | 37       | 0.00024 - 0.125          | 0.00195                         | 0.125                           | 0.00295                         | -            |
| <b>Amphotericin B</b>    | <b>N</b> | <b>MIC range (µg/mL)</b> | <b>MIC<sub>50</sub> (µg/mL)</b> | <b>MIC<sub>90</sub> (µg/mL)</b> | <b>MIC<sub>GM</sub> (µg/mL)</b> | <b>R (%)</b> |
| <i>A. niger</i>          | 21       | 0.25 - 8                 | 8                               | 8                               | 4.56                            | 17 (81%)     |
| <i>A. tubingenensis</i>  | 11       | 4 - 16                   | 8                               | 8                               | 8                               | 11 (100%)    |
| <i>A. luchuensis</i>     | 1        | 1                        | -                               | -                               | -                               | -            |
| Black aspergilli         | 4        | 4 - 8                    | -                               | -                               | -                               | 4 (100%)     |
| Total                    | 37       | 0.25 - 16                | 8                               | 8                               | 5                               | 32 (86.5%)   |
| <b>Voriconazole</b>      | <b>N</b> | <b>MIC range (µg/mL)</b> | <b>MIC<sub>50</sub> (µg/mL)</b> | <b>MIC<sub>90</sub> (µg/mL)</b> | <b>MIC<sub>GM</sub> (µg/mL)</b> | <b>R (%)</b> |
| <i>A. niger</i>          | 21       | 0.0625 - 2               | 1                               | 2                               | 0.99                            | 5 (23.8%)    |
| <i>A. tubingenensis</i>  | 11       | 0.5 - 4                  | 1                               | 2                               | 1.20                            | 4 (36.4%)    |
| <i>A. luchuensis</i>     | 1        | 0.0078                   | -                               | -                               | -                               | -            |
| Black aspergilli         | 4        | 0.5 - 2                  | -                               | -                               | -                               | 2 (50%)      |
| Total                    | 37       | 0.0078 - 4               | 1                               | 2                               | 0.77                            | 11 (29.7%)   |
| <b>Posaconazole</b>      | <b>N</b> | <b>MIC range (µg/mL)</b> | <b>MIC<sub>50</sub> (µg/mL)</b> | <b>MIC<sub>90</sub> (µg/mL)</b> | <b>MIC<sub>GM</sub> (µg/mL)</b> | <b>R (%)</b> |
| <i>A. niger</i>          | 21       | 0.0625 - 4               | 2                               | 2                               | 1.26                            | 17 (81%)     |
| <i>A. tubingenensis</i>  | 11       | 0.125 - 4                | 2                               | 4                               | 2.13                            | 10 (90.9%)   |
| <i>A. luchuensis</i>     | 1        | 0.5                      | -                               | -                               | -                               | -            |
| Black aspergilli         | 4        | 0.25 - 4                 | -                               | -                               | -                               | 4 (100%)     |
| Total                    | 37       | 0.0625 - 4               | 2                               | 4                               | 1.45                            | 31 (83.8%)   |
| <b>Caspofungin</b>       | <b>N</b> | <b>MEC range (µg/mL)</b> | <b>MEC<sub>50</sub> (µg/mL)</b> | <b>MEC<sub>90</sub> (µg/mL)</b> | <b>MEC<sub>GM</sub> (µg/mL)</b> | <b>R (%)</b> |
| <i>A. niger</i>          | 21       | 0.0078 - 1               | 0.125                           | 0.5                             | 0.099                           | 11 (52.4%)   |
| <i>A. tubingenensis</i>  | 11       | 0.032 - 0.5              | 0.125                           | 0.5                             | 0.133                           | 7 (63.6%)    |
| <i>A. luchuensis</i>     | 1        | 0.032                    | -                               | -                               | -                               | -            |
| Black aspergilli         | 4        | 0.0625 - 0.25            | -                               | -                               | -                               | 2 (50%)      |
| Total                    | 37       | 0.0078 - 1               | 0.125                           | 0.5                             | 0.107                           | 20 (54.1%)   |

N, number; MEC, Minimum effective concentration; MIC, Minimum inhibitory concentration; R, Resistant

### ***Environmental isolates***

Table 4 summarizes the *in vitro* susceptibilities of 30 environmental *Aspergillus Nigri* against several antifungals. The same as clinical isolates, the lowest MIC range was 0.00049 - 0.00781  $\mu\text{g/ml}$  for luliconazole. Moreover, the MIC<sub>50</sub>, MIC<sub>90</sub> and MIC<sub>GM</sub> were 0.00195, 0.00391 and 0.00195  $\mu\text{g/ml}$ , respectively. The MEC range, MEC<sub>50</sub>, MEC<sub>90</sub> and MEC<sub>GM</sub> for caspofungin were 0.0078 - 0.5, 0.0625, 0.25, and 0.0507  $\mu\text{g/ml}$ , respectively. Furthermore, 30% of environmental strains were resistant to caspofungin. As shown, the MIC range for amphotericin B was 2 - 16  $\mu\text{g/ml}$  followed by, MIC<sub>50</sub>, MIC<sub>90</sub> and MIC<sub>GM</sub> were 8, 8 and 6.063  $\mu\text{g/ml}$ , respectively. Moreover, 96.7% of strains were resistant to antifungal. Totally, the MIC range voriconazole for environmental isolates of *Aspergillus* was 0.0625 - 2  $\mu\text{g/ml}$ , whereas MIC<sub>90</sub> 2  $\mu\text{g/ml}$ , MIC<sub>50</sub> 0.5 and MIC<sub>GM</sub> 0.4665  $\mu\text{g/ml}$ ). Our results indicated that only 4 (13.3%) of strains were resistant to voriconazole. The tested isolates were inhibited at MIC range 0.0625 - 4  $\mu\text{g/ml}$  by posaconazole. Furthermore, the MIC<sub>50</sub>, MIC<sub>90</sub> and MIC<sub>GM</sub> were 2, 4 and 1.2599  $\mu\text{g/ml}$ , respectively. In addition, 70% of strains were resistant to posaconazole.

**Table 4:** The antifungal susceptibility pattern of 30 environmental strains of black aspergilli

| <b>Luliconazole</b>      | <b>N</b> | <b>MIC range (µg/mL)</b> | <b>MIC<sub>50</sub> (µg/mL)</b> | <b>MIC<sub>90</sub> (µg/mL)</b> | <b>MIC<sub>GM</sub> (µg/mL)</b> | <b>R (%)</b> |
|--------------------------|----------|--------------------------|---------------------------------|---------------------------------|---------------------------------|--------------|
| <i>Aspergillus niger</i> | 15       | 0.00098 - 0.0078         | 0.00195                         | 0.00391                         | 0.00214                         | -            |
| <i>A. tubingensis</i>    | 13       | 0.00049 - 0.00781        | 0.00195                         | 0.00391                         | 0.00195                         | -            |
| <i>A. piperis</i>        | 1        | 0.00195                  | -                               | -                               | -                               | -            |
| Black aspergilli         | 1        | 0.00049                  | -                               | -                               | -                               | -            |
| Total                    | 30       | 0.00049 - 0.00781        | 0.00195                         | 0.00391                         | 0.00195                         | -            |
| <b>Amphotericin B</b>    | <b>N</b> | <b>MIC range (µg/mL)</b> | <b>MIC<sub>50</sub> (µg/mL)</b> | <b>MIC<sub>90</sub> (µg/mL)</b> | <b>MIC<sub>GM</sub> (µg/mL)</b> | <b>R (%)</b> |
| <i>A. niger</i>          | 15       | 2 - 16                   | 8                               | 16                              | 6.964                           | 14 (93%)     |
| <i>A. tubingensis</i>    | 13       | 4 - 8                    | 4                               | 8                               | 5.508                           | 13 (100%)    |
| <i>A. piperis</i>        | 1        | 4                        | -                               | -                               | -                               | -            |
| Black aspergilli         | 1        | 4                        | -                               | -                               | -                               | -            |
| Total                    | 30       | 2 - 16                   | 8                               | 8                               | 6.063                           | 29 (96.7%)   |
| <b>Voriconazole</b>      | <b>N</b> | <b>MIC range (µg/mL)</b> | <b>MIC<sub>50</sub> (µg/mL)</b> | <b>MIC<sub>90</sub> (µg/mL)</b> | <b>MIC<sub>GM</sub> (µg/mL)</b> | <b>R (%)</b> |
| <i>A. niger</i>          | 15       | 0.125 - 2                | 1                               | 2                               | 0.6300                          | 2 (13.3%)    |
| <i>A. tubingensis</i>    | 13       | 0.0625 - 2               | 0.5                             | 2                               | 0.4261                          | 2 (15.4%)    |
| <i>A. piperis</i>        | 1        | 0.125                    | -                               | -                               | -                               | -            |
| Black aspergilli         | 1        | 0.0625                   | -                               | -                               | -                               | -            |
| Total                    | 30       | 0.0625 - 2               | 0.5                             | 2                               | 0.4665                          | 4 (13.3%)    |
| <b>Posaconazole</b>      | <b>N</b> | <b>MIC range (µg/mL)</b> | <b>MIC<sub>50</sub> (µg/mL)</b> | <b>MIC<sub>90</sub> (µg/mL)</b> | <b>MIC<sub>GM</sub> (µg/mL)</b> | <b>R (%)</b> |
| <i>A. niger</i>          | 15       | 0.5 - 4                  | 2                               | 4                               | 1.8234                          | 14 (93%)     |
| <i>A. tubingensis</i>    | 13       | 0.125 - 4                | 2                               | 4                               | 1.1125                          | 7 (53.8%)    |
| <i>A. piperis</i>        | 1        | 0.5                      | -                               | -                               | -                               | -            |
| Black aspergilli         | 1        | 0.0625                   | -                               | -                               | -                               | -            |
| Total                    | 30       | 0.0625 - 4               | 2                               | 4                               | 1.2599                          | 21 (70%)     |
| <b>Caspofungin</b>       | <b>N</b> | <b>MEC range (µg/mL)</b> | <b>MEC<sub>50</sub> (µg/mL)</b> | <b>MEC<sub>90</sub> (µg/mL)</b> | <b>MEC<sub>GM</sub> (µg/mL)</b> | <b>R (%)</b> |
| <i>A. niger</i>          | 15       | 0.0078 - 0.25            | 0.032                           | 0.25                            | 0.0412                          | 3 (20%)      |
| <i>A. tubingensis</i>    | 13       | 0.0078 - 0.5             | 0.0625                          | 0.5                             | 0.0733                          | 6 (46.2%)    |
| <i>A. piperis</i>        | 1        | 0.0625                   | -                               | -                               | -                               | -            |
| Black aspergilli         | 1        | 0.0078                   | -                               | -                               | -                               | -            |
| Total                    | 30       | 0.0078 - 0.5             | 0.0625                          | 0.25                            | 0.0507                          | 9 (30%)      |

N, number; MEC, Minimum effective concentration; MIC, Minimum inhibitory concentration; R, Resistant

Caspofungin was significantly more effective against environmental than clinical strains ( $P = 0.048$ ). However, the inhibitory effect of other antifungals (amphotericin B, posaconazole and voriconazole) against both strains (clinical and environmental) was similar (amphotericin B,  $P=0.147$ ; voriconazole,  $P=0.109$ ; posaconazole,  $P=0.178$ ). When we compared the effect antifungals against *A. niger* and *A. tubingensis* among clinical and environmental strains, it is found that caspofungin was more effective on *A. niger* with environmental sources than clinical strains ( $P=0.0482$ ). Whereas, the effect of other antifungals against both species was not significant.

Our results showed that 32 (86.5%) of clinical strains were resistant to 2, 3 or 4 antifungals, 2 (5.4%) isolates were resistant to one antifungal and 3 (8.1%) were fully susceptible to antifungals (Table 5). Two strains of *A. tubingensis*, one *A. niger* and one black aspergilli were resistant to all antifungals (except luliconazole). On the other hand, in environmental strains, 21 (70%) of strains were resistance to 2 - 4 antifungals and only 30% of strains were resistance to one antifungals (Table 6). Two strains of *A. niger* and one *A. tubingensis* were resistant to all antifungals (except luliconazole).

**Table 5:** Drug resistance against tested antifungals among 37 clinical strains

| Species<br>(Clinical)    | Antifungal drugs |     |     |     |     |
|--------------------------|------------------|-----|-----|-----|-----|
|                          | LUL              | POS | VOR | AMP | CAS |
| <i>Aspergillus niger</i> | 0.125            | R   | S   | R   | R   |
| <i>A. niger</i>          | 0.125            | S   | S   | R   | R   |
| <i>A. niger</i>          | 0.125            | S   | S   | R   | R   |
| <i>A. niger</i>          | 0.125            | R   | S   | R   | R   |
| <i>A. tubingensis</i>    | 0.125            | R   | S   | R   | R   |
| <i>A. niger</i>          | 0.01561          | R   | S   | R   | R   |
| <i>A. niger</i>          | 0.00781          | R   | S   | R   | R   |
| <i>A. niger</i>          | 0.00781          | R   | S   | S   | S   |
| <i>A. tubingensis</i>    | 0.00391          | R   | R   | R   | R   |
| Black aspergilli         | 0.00391          | R   | S   | R   | S   |
| <i>A. tubingensis</i>    | 0.00391          | R   | R   | R   | R   |
| <i>A. niger</i>          | 0.00391          | R   | S   | R   | R   |
| <i>A. niger</i>          | 0.00195          | R   | R   | R   | S   |

|                       |         |   |   |   |   |
|-----------------------|---------|---|---|---|---|
| <i>A. tubingensis</i> | 0.00195 | R | R | R | S |
| <i>A. tubingensis</i> | 0.00195 | R | R | R | S |
| Black aspergilli      | 0.00195 | R | R | R | S |
| <i>A. tubingensis</i> | 0.00195 | R | S | R | R |
| <i>A. niger</i>       | 0.00195 | R | S | R | R |
| <i>A. tubingensis</i> | 0.00195 | R | S | R | R |
| <i>A. niger</i>       | 0.00195 | R | R | R | S |
| <i>A. tubingensis</i> | 0.00195 | R | S | R | S |
| <i>A. niger</i>       | 0.00195 | R | R | R | S |
| Black aspergilli      | 0.00195 | R | R | R | R |
| <i>A. niger</i>       | 0.00195 | R | S | R | S |
| <i>A. tubingensis</i> | 0.00195 | S | S | R | R |
| <i>A. niger</i>       | 0.00098 | R | S | R | S |
| <i>A. niger</i>       | 0.00098 | R | S | R | R |
| <i>A. niger</i>       | 0.00098 | R | S | S | S |
| <i>A. niger</i>       | 0.00098 | R | R | R | R |
| <i>A. tubingensis</i> | 0.00098 | R | S | R | S |
| <i>A. niger</i>       | 0.00098 | R | R | R | S |
| <i>A. niger</i>       | 0.00098 | R | S | R | R |
| <i>A. luchuensis</i>  | 0.00098 | S | S | S | S |
| Black aspergilli      | 0.00049 | S | S | R | R |
| <i>A. tubingensis</i> | 0.00024 | R | S | R | R |
| <i>A. niger</i>       | 0.00024 | S | S | S | S |
| <i>A. niger</i>       | 0.00024 | S | S | S | S |

LUL, Luliconazole; POS, Posaconazole; VOR, Voriconazole; AMP, Amphotericin B; CAS, Caspofungin; R, Resistance; S, Susceptible

**Table 6:** Drug resistance against tested antifungals among 30 environmental strains

| Species<br>(Environmental) | Antifungal drugs |     |     |     |     |
|----------------------------|------------------|-----|-----|-----|-----|
|                            | LUL              | POS | VOR | AMP | CAS |
| <i>Aspergillus niger</i>   | 0.00781          | R   | S   | R   | S   |
| <i>A. tubingensis</i>      | 0.00781          | R   | R   | R   | S   |
| <i>A. niger</i>            | 0.00391          | R   | S   | R   | S   |
| <i>A. niger</i>            | 0.00391          | R   | S   | R   | S   |
| <i>A. niger</i>            | 0.00391          | R   | R   | R   | R   |
| <i>A. tubingensis</i>      | 0.00391          | R   | R   | R   | R   |
| <i>A. niger</i>            | 0.00391          | R   | S   | R   | S   |
| <i>A. niger</i>            | 0.00195          | R   | S   | R   | S   |
| <i>A. tubingensis</i>      | 0.00195          | R   | S   | R   | R   |
| <i>A. niger</i>            | 0.00195          | R   | S   | R   | S   |

|                       |         |   |   |   |   |
|-----------------------|---------|---|---|---|---|
| <i>A. tubingensis</i> | 0.00195 | S | S | R | S |
| <i>A. niger</i>       | 0.00195 | R | S | R | S |
| <i>A. niger</i>       | 0.00195 | R | S | S | S |
| <i>A. tubingensis</i> | 0.00195 | S | S | R | S |
| <i>A. niger</i>       | 0.00195 | R | S | R | R |
| <i>A. tubingensis</i> | 0.00195 | S | S | R | S |
| <i>A. tubingensis</i> | 0.00195 | R | S | R | R |
| <i>A. tubingensis</i> | 0.00195 | R | S | R | R |
| <i>A. tubingensis</i> | 0.00195 | R | S | R | S |
| <i>A. tubingensis</i> | 0.00195 | R | S | R | R |
| <i>A. niger</i>       | 0.00195 | R | S | R | S |
| <i>A. tubingensis</i> | 0.00195 | S | S | R | S |
| <i>A. piperis</i>     | 0.00195 | S | S | R | S |
| <i>A. niger</i>       | 0.00098 | S | S | R | S |
| <i>A. niger</i>       | 0.00098 | R | S | R | S |
| <i>A. tubingensis</i> | 0.00098 | S | S | R | S |
| <i>A. niger</i>       | 0.00098 | R | R | R | R |
| <i>A. niger</i>       | 0.00098 | R | S | R | S |
| Black aspergilli      | 0.00049 | S | S | R | S |
| <i>A. tubingensis</i> | 0.00049 | S | S | R | R |

LUL, Luliconazole; POS, Posaconazole; VOR, Voriconazole; AMP, Amphotericin B; CAS, Caspofungin; R, Resistance; S, Susceptible

## Discussion

*Aspergillus* strains isolated from clinical and air borne samples were identified using classical morphological features and molecular methods. Moreover, their susceptibilities to several antifungals including luliconazole, voriconazole, posaconazole, amphotericin B, and caspofungin were assayed. *Aspergillus tubingensis*, *A. luchuensis* and *A. piperis* were identified as the cryptic species of *A. niger* sensu lato by the sequence analysis of  $\beta$ -tubulin gene. Several reports have shown that *A. niger* is generally as common causative agent of otomycosis and one of the most important agent for invasive aspergillosis [20, 22, 26, 39, 40]. However, new molecular techniques are indicating that this species comprises 19 cryptic species [4, 16, 21].

Some studies have shown a high efficacy of luliconazole against dermatophytes and onychomycosis agents both *in vivo* and *in vitro* [1, 2, 7, 8, 41]. Furthermore, recently a few studies examined the potency of luliconazole against different species of *Candida*, *A. fumigatus*, *A. terreus* and *Fusarium* species [5, 6, 42]. However, the potency profile of luliconazole against *A. niger*, complex is unknown. Our results showed that, although the MIC range for strains was extremely low, this range for environmental strains (0.00781-0.00049  $\mu\text{g/ml}$ ) was lower than clinical strains (0.125 - 0.00024  $\mu\text{g/ml}$ ). As shown in table 5, only five clinical strains (*A. niger sensu stricto*, 4 isolates and *A. tubingensis*, 1 isolate) have a MIC = 0.125  $\mu\text{g/ml}$ . 30/30 (100%) of environmental and 83.8% of clinical strains had the lowest MICs (MICs < 0.00781  $\mu\text{g/ml}$ ) against luliconazole. Moreover, the MIC<sub>GM</sub> for environmental and clinical strains were 0.00195 and 0.00295  $\mu\text{g/ml}$ , respectively. Abastabar et al. [3] and Omran et al. [6] were tested luliconazole against *A. fumigatus* and *A. flavus*, and found that the antifungal has the lowest MICs against *A. fumigatus* (MIC<sub>90</sub> 0.002  $\mu\text{g/ml}$ ) and *A. flavus* (MIC<sub>90</sub> 0.032  $\mu\text{g/ml}$ ), respectively.

There are the limited data in *in vitro* efficacy of antifungals against the black aspergilli both from clinical and environmental sources. While, the clinical and environmental strains had the same MIC ranges for caspofungin, the resistant to antifungal showed the clear differences between clinical and environmental strains (P = 0.048), where the clinical isolates showed higher resistant rate than the environmental strains. In a report by Badali *et al.*, only 6.1% of environmental strains of *A. niger* were resistant to caspofungin and all clinical isolates ranged at 0.008–0.063  $\mu\text{g/ml}$  [21].

The *in vitro* activities of posaconazole, voriconazole, and amphotericin B against clinical *Aspergillus* strains have been reported by Arikan *et al.* [10]. They reported that voriconazole was the most active antifungal against *A. niger*. Comparable to our results, voriconazole was more potent than the other tested antifungals (with exception luliconazole)

against both clinical and environmental strains. *Aspergillus tubingensis* resistant strains to amphotericin B was very common both in environment and clinical settings, followed by posaconazole, caspofungin, and voriconazole. However, the resistant rate to amphotericin B was lower among environmental than clinical strains. Hashimoto et al., finding suggests that *A. tubingensis* is intrinsically resistant to azole antifungals [15]. Antifungal susceptibility testing of our *A. tubingensis* strains revealed 90.9% and 53.8% of clinical and environmental isolates were resistant to posaconazole.

In conclusion, luliconazole compare to amphotericin B, voriconazole, posaconazole and caspofungin is a potent antifungal for *A. niger* sensu lato *in vitro*. The MIC range, MIC<sub>50</sub>, MIC<sub>90</sub> and MIC<sub>GM</sub> of luliconazole against black aspergilli were the lowest among the representative tested antifungals. However, these results suggest luliconazole can be a viable option for the treatment of infections due to black aspergilli and should be further investigated *in vivo*. There is no available systemic formulation of luliconazole and it is strongly suggested that systemic formulation of drug test *in vivo*.

### **Acknowledgments**

We would like to thank the Infectious and Tropical Diseases Research Center, Health Research Institute, Ahvaz Jundishapur University of Medical Sciences for their support.

### **Authors' Contribution**

Study concept and design, Ali Zarei Mahmoudabadi; isolation and preparing clinical and environmental isolates, Marzieh Halvaezadeh and Sahar Hivary; conducting the experiments, Sahar Hivary; data analysis and interpretation of the results, Ali Zarei Mahmoudabadi, Mahnaz Fatahinia, and Sahar Hivary; drafting of the manuscript, Ali Zarei Mahmoudabadi; Critical editing Mahnaz Fatahinia.

### **Funding support**



This study was a part of MSc thesis (Sahar Hivary) supported by a grant (No: OG-96148) from the Ahvaz Jundishapur University of Medical Sciences, Ahvaz, Iran.

### **Conflict of interest**

No conflict of interest declared.

### **Ethics statement**

This project was approved by the ethical committee of Ahvaz Jundishapur University of Medical Sciences (IR.AJUMS.REC.1396.1066).

### **References**

- [1] Koga H, Nanjoh Y, Makimura K, Tsuboi R. In vitro antifungal activities of luliconazole, a new topical imidazole. *Medical mycology* 2009;47(6):640-7.
- [2] Koga H, Nanjoh Y, Kaneda H, Yamaguchi H, Tsuboi R. Short-term therapy with luliconazole, a novel topical antifungal imidazole, in guinea pig models of tinea corporis and tinea pedis. *Antimicrobial agents and chemotherapy* 2012;56(6):3138-43.
- [3] Abastabar M, Rahimi N, Meis JF, Aslani N, Khodavaisy S, Nabili M, et al. Potent Activities of Novel Imidazoles Lanoconazole and Luliconazole against a Collection of Azole-Resistant and -Susceptible *Aspergillus fumigatus* Strains. *Antimicrobial agents and chemotherapy* 2016;60(11):6916-9.
- [4] Hagiwara S, Tamura T, Satoh K, Kamewada H, Nakano M, Shinden S, et al. The Molecular Identification and Antifungal Susceptibilities of *Aspergillus* Species Causing Otomycosis in Tochigi, Japan. *Mycopathologia* 2018.
- [5] Zargaran M, Taghipour S, Kiasat N, Aboualigalehdari E, Rezaei-Matehkolaei A, Zarei Mahmoudabadi A, et al. Luliconazole, an alternative antifungal agent against *Aspergillus terreus*. *Journal de mycologie medicale* 2017;27(3):351-6.
- [6] Omran SM, Taghizadeh-Armaki M, Zarrinfar H, Hedayati MT, Abastabar M, Moqarabzadeh V, et al. In-vitro antifungal susceptibility testing of lanoconazole and luliconazole against *Aspergillus flavus* as an important agent of invasive aspergillosis. *Journal of infection and chemotherapy : official journal of the Japan Society of Chemotherapy* 2019;25(2):157-60.
- [7] Khanna D, Bharti S. Luliconazole for the treatment of fungal infections: an evidence-based review. *Core evidence* 2014;9:113-24.

- [8] Scher RK, Nakamura N, Tavakkol A. Luliconazole: a review of a new antifungal agent for the topical treatment of onychomycosis. *Mycoses* 2014;57(7):389-93.
- [9] Ellis D. Amphotericin B: spectrum and resistance. *The Journal of antimicrobial chemotherapy* 2002;49 Suppl 1(1):7-10.
- [10] Arikan S, Sancak B, Alp S, Hascelik G, McNicholas P. Comparative in vitro activities of posaconazole, voriconazole, itraconazole, and amphotericin B against *Aspergillus* and *Rhizopus*, and synergy testing for *Rhizopus*. *Medical mycology* 2008;46(6):567-73.
- [11] Maertens J, Raad I, Petrikos G, Boogaerts M, Selleslag D, Petersen FB, et al. Efficacy and safety of caspofungin for treatment of invasive aspergillosis in patients refractory to or intolerant of conventional antifungal therapy. *Clinical Infectious Diseases* 2004;39(11):1563-71.
- [12] Herbrecht R, Denning DW, Patterson TF, Bennett JE, Greene RE, Oestmann J-W, et al. Voriconazole versus amphotericin B for primary therapy of invasive aspergillosis. *New England Journal of Medicine* 2002;347(6):408-15.
- [13] Walsh TJ, Raad I, Patterson TF, Chandrasekar P, Donowitz GR, Graybill R, et al. Treatment of invasive aspergillosis with posaconazole in patients who are refractory to or intolerant of conventional therapy: an externally controlled trial. *Clinical infectious diseases* 2007;44(1):2-12.
- [14] Egerer G, Reichert D, Pletz MW, Kaskel P, Krobot KJ, Maertens J. Caspofungin for treatment of invasive aspergillosis in Germany: results of a pre-planned subanalysis of an international registry. *European journal of medical research* 2012;17(1):7.
- [15] Hashimoto A, Hagiwara D, Watanabe A, Yahiro M, Yikelamu A, Yaguchi T, et al. Drug Sensitivity and Resistance Mechanism in *Aspergillus Section Nigri* Strains from Japan. *Antimicrobial agents and chemotherapy* 2017;61(8).
- [16] Gautier M, Normand AC, L'Ollivier C, Cassagne C, Reynaud-Gaubert M, Dubus JC, et al. *Aspergillus tubingensis*: a major filamentous fungus found in the airways of patients with lung disease. *Medical mycology* 2016;54(5):459-70.
- [17] D'Hooge E, Becker P, Stubbe D, Normand AC, Piarroux R, Hendrickx M. Black aspergilli: A remaining challenge in fungal taxonomy? *Medical mycology* 2018.
- [18] Varga J, Frisvad JC, Kocsube S, Brankovics B, Toth B, Szigeti G, et al. New and revisited species in *Aspergillus section Nigri*. *Stud Mycol* 2011;69(1):1-17.

- [19] Castro C, Galan-Sanchez F, Linares MJ, Tejero R, Ruiz M, Serrano ML, et al. A prospective survey of *Aspergillus* spp. in respiratory tract samples: Species identification and susceptibility patterns. *Medical mycology* 2018.
- [20] Ali K, Hamed MA, Hassan H, Esmail A, Sheneef A. Identification of Fungal Pathogens in Otorhinomycosis and Their Drug Sensitivity: Our Experience. *International archives of otorhinolaryngology* 2018;22(4):400-3.
- [21] Badali H, Fakhim H, Zarei F, Nabili M, Vaezi A, Poorzad N, et al. In Vitro Activities of Five Antifungal Drugs Against Opportunistic Agents of *Aspergillus Nigri* Complex. *Mycopathologia* 2016;181(3-4):235-40.
- [22] Vermeulen E, Maertens J, Meersseman P, Saegeman V, Dupont L, Lagrou K. Invasive *Aspergillus niger* complex infections in a Belgian tertiary care hospital. *Clinical microbiology and infection : the official publication of the European Society of Clinical Microbiology and Infectious Diseases* 2014;20(5):O333-5.
- [23] Koehler P, Tacke D, Cornely OA. Aspergillosis of bones and joints - a review from 2002 until today. *Mycoses* 2014;57(6):323-35.
- [24] Simmonds L, Mitchell S, White B, Crusz SA, Denning D. *Aspergillus niger* infection in an immunosuppressed patient confined solely to the brain. *BMJ case reports* 2017;2017.
- [25] Ugurlu S, Maden A, Sefi N, Sener G, Yulug N. *Aspergillus niger* infection of exenterated orbit. *Ophthalmic plastic and reconstructive surgery* 2001;17(6):452-3.
- [26] Atchade E, Jean-Baptiste S, Houze S, Chabut C, Massias L, Castier Y, et al. Fatal invasive aspergillosis caused by *Aspergillus niger* after bilateral lung transplantation. *Medical mycology case reports* 2017;17:4-7.
- [27] Peghin M, Monforte V, Martin-Gomez MT, Ruiz-Camps I, Berastegui C, Saez B, et al. 10 years of prophylaxis with nebulized liposomal amphotericin B and the changing epidemiology of *Aspergillus* spp. infection in lung transplantation. *Transplant international : official journal of the European Society for Organ Transplantation* 2016;29(1):51-62.
- [28] Martin-Mazuelos E, Peman J, Valverde A, Chaves M, Serrano MC, Canton E. Comparison of the Sensititre YeastOne colorimetric antifungal panel and Etest with the NCCLS M38-A method to determine the activity of amphotericin B and itraconazole against clinical isolates of *Aspergillus* spp. *The Journal of antimicrobial chemotherapy* 2003;52(3):365-70.

- [29] Van Der Linden JW, Warris A, Verweij PE. *Aspergillus* species intrinsically resistant to antifungal agents. *Medical mycology* 2011;49 Suppl 1:S82-9.
- [30] Makimura K, Tamura Y, Mochizuki T, Hasegawa A, Tajiri Y, Hanazawa R, et al. Phylogenetic classification and species identification of dermatophyte strains based on DNA sequences of nuclear ribosomal internal transcribed spacer 1 regions. *Journal of clinical microbiology* 1999;37(4):920-4.
- [31] Glass NL, Donaldson GC. Development of primer sets designed for use with the PCR to amplify conserved genes from filamentous ascomycetes. *Applied and environmental microbiology* 1995;61(4):1323-30.
- [32] Reference method for broth dilution antifungal susceptibility testing of filamentous fungi, approved standard. Second edition. M38-A2. . 2008;28(16).
- [33] Lass-Florl C. Susceptibility testing in *Aspergillus* species complex. *Clinical microbiology and infection : the official publication of the European Society of Clinical Microbiology and Infectious Diseases* 2014;20 Suppl 6:49-53.
- [34] Espinel-Ingroff A, Cuenca-Estrella M, Fothergill A, Fuller J, Ghannoum M, Johnson E, et al. Wild-type MIC distributions and epidemiological cutoff values for amphotericin B and *Aspergillus* spp. for the CLSI broth microdilution method (M38-A2 document). *Antimicrobial agents and chemotherapy* 2011;55(11):5150-4.
- [35] Espinel-Ingroff A, Diekema DJ, Fothergill A, Johnson E, Pelaez T, Pfaller MA, et al. Wild-type MIC distributions and epidemiological cutoff values for the triazoles and six *Aspergillus* spp. for the CLSI broth microdilution method (M38-A2 document). *Journal of clinical microbiology* 2010;48(9):3251-7.
- [36] Espinel-Ingroff A, Fothergill A, Fuller J, Johnson E, Pelaez T, Turnidge J. Wild-type MIC distributions and epidemiological cutoff values for caspofungin and *Aspergillus* spp. for the CLSI broth microdilution method (M38-A2 document). *Antimicrobial agents and chemotherapy* 2011;55(6):2855-9.
- [37] Pfaller MA, Boyken L, Hollis RJ, Kroeger J, Messer SA, Tendolkar S, et al. In vitro susceptibility of clinical isolates of *Aspergillus* spp. to anidulafungin, caspofungin, and micafungin: a head-to-head comparison using the CLSI M38-A2 broth microdilution method. *Journal of clinical microbiology* 2009;47(10):3323-5.
- [38] Blum G, Perkhofer S, Haas H, Schrettl M, Wurzner R, Dierich MP, et al. Potential basis for amphotericin B resistance in *Aspergillus terreus*. *Antimicrobial agents and chemotherapy* 2008;52(4):1553-5.

- [39] Kaya AD, Kiraz N. In vitro susceptibilities of *Aspergillus* spp. causing otomycosis to amphotericin B, voriconazole and itraconazole. *Mycoses* 2007;50(6):447-50.
- [40] Baddley JW, Marr KA, Andes DR, Walsh TJ, Kauffman CA, Kontoyiannis DP, et al. Patterns of susceptibility of *Aspergillus* isolates recovered from patients enrolled in the Transplant-Associated Infection Surveillance Network. *Journal of clinical microbiology* 2009;47(10):3271-5.
- [41] Baghi N, Shokohi T, Badali H, Makimura K, Rezaei-Matehkolaei A, Abdollahi M, et al. In vitro activity of new azoles luliconazole and laniconazole compared with ten other antifungal drugs against clinical dermatophyte isolates. *Medical mycology* 2016;54(7):757-63.
- [42] Taghipour S, Kiasat N, Shafiei S, Halvaezadeh M, Rezaei-Matehkolaei A, Zarei Mahmoudabadi A. Luliconazole, a new antifungal against *Candida* species isolated from different sources. *Journal de mycologie medicale* 2018;28(2):374-8.
